# Supplementary material for: A highly stable indium phosphonocarboxylate framework as a multifunctional sensor for Cu2+ and methylviologen ions
Source: Royal Society of Chemistry journal article supplement (doi:10.1039/c4dt03502j), 2015-01-01
Supplement: c4dt03502j1.pdf [file c4dt03502j1.pdf]

**Electronic Supporting Information**

**A Highly Stable Indium Phosphonocarboxylate Framework  
as a Multifunctional Sensor for Cu<sup>2+</sup> and Methylviologen  
Ions**

Wenyan Dan, Xiaofeng Liu, Mingli Deng, Yun Ling, Zhenxia Chen\*, Yaming Zhou\*

Department of Chemistry, Fudan University, 220 Handan Road, Shanghai 200433, P.

R. China

Tel: + 86 21 65643925, Fax:+86 21 65642261, e-mail:zhxchen@fudan.edu.cn;

ymzhou@fudan.edu.cn

|                                                                                                                                                                                                                 |    |
|-----------------------------------------------------------------------------------------------------------------------------------------------------------------------------------------------------------------|----|
| Table S1 Selected bond lengths (Å) and angles (°) for InPCF-1. ....                                                                                                                                             | 1  |
| Table S2 Hydrogen bonds for InPCF-1 <sup>a</sup> . ....                                                                                                                                                         | 2  |
| Table S3 Comparison of some MOFs for sensing Cu <sup>2+</sup> ion at room temperature.....                                                                                                                      | 3  |
| Figure S1 Packing view of InPCF-1 (Water and hydrogen atoms is omitted for clarity yellow columns are added to highlight the 1-D channels).....                                                                 | 4  |
| Figure S2 TGA curve of as-synthesized InPCF-1. ....                                                                                                                                                             | 5  |
| Figure S3 The PXRD patterns for InPCF-1 in boiling water for up to 7 days. ....                                                                                                                                 | 6  |
| Figure S4 The PXRD patterns for InPCF-1 measured during chemical stability tests. (a) In refluxing EtOH at 80 °C for up to 7 days. (b) In refluxing toluene at 110 °C for up to 7 days.....                     | 7  |
| Figure S5 The CO <sub>2</sub> isotherms at 273 K and 298 K for InPCF-1. ....                                                                                                                                    | 8  |
| Figure S6 The CO <sub>2</sub> isotherms at 273 K and 298 K (symbols) and the Virial equation fits (lines) for InPCF-1.....                                                                                      | 9  |
| Figure S7 Isothermic heats of CO <sub>2</sub> adsorption for InPCF-1.....                                                                                                                                       | 10 |
| Figure S8 The CH <sub>3</sub> OH isotherm at 298 K for InPCF-1.....                                                                                                                                             | 11 |
| Figure S9 The H <sub>2</sub> O isotherm at 298 K for InPCF-1. ....                                                                                                                                              | 12 |
| Figure S10 The C <sub>2</sub> H <sub>5</sub> OH isotherm at 298 K for InPCF-1. ....                                                                                                                             | 13 |
| Figure S11 Solid state luminescence spectra of ligand and InPCF-1a upon excitation at 290 nm at room temperature. ....                                                                                          | 14 |
| Figure S12 Luminescence spectra of ligand and InPCF-1a in DMF solution upon excitation at 290 nm. ....                                                                                                          | 15 |
| Figure S13 Multiple cycles for the quenching by Cu(NO <sub>3</sub> ) <sub>2</sub> and the recovery after filtration and ultrasonic washing by DMF for three times. The red bars show the pristine intensity and |    |

|                                                                                                                                                                                                                                                                 |    |
|-----------------------------------------------------------------------------------------------------------------------------------------------------------------------------------------------------------------------------------------------------------------|----|
| regenerated ones after washing; while the blue bars show the intensities after addition of $\text{Cu}(\text{NO}_3)_2$ @DMF solutions.....                                                                                                                       | 16 |
| Figure S14 PXRD of InPCF-1a and sample after immersing $\text{M}(\text{NO}_3)_2$ ( $\text{M} = \text{Cu}^{2+}$ $\text{Zn}^{2+}$ $\text{Ni}^{2+}$ $\text{Co}^{2+}$ ) DMF solution.....                                                                           | 18 |
| Figure S15 Photographs of InPCF-1a soaked in DMF solution containing $\text{M}(\text{NO}_3)_2$ with $10^{-2}$ M, a) $\text{Cu}^{2+}$ , b) $\text{Co}^{2+}$ , c) $\text{Ni}^{2+}$ , d) $\text{Zn}^{2+}$ for 24 h.....                                            | 19 |
| Figure S16 The EDS of the solid samples of InPCF-1a- $\text{Cu}^{2+}$ obtained by centrifugal separation of InPCF-1a soaked in DMF solution containing $\text{M}(\text{NO}_3)_2$ with $10^{-2}$ M, washing with DMF, and drying in $60^\circ\text{C}$ oven..... | 20 |
| Figure S17 X-ray photoelectron spectroscopy (XPS) spectra of $\text{Cu}^{2+}$ -incorporated InPCF-1a.....                                                                                                                                                       | 21 |
| Figure S18 (a) and (b) Concentration-dependent luminescence intensities of InPCF-1a by the addition of different contents of $\text{MV}^{2+}$ DMF solution (Ex at 290 nm).....                                                                                  | 22 |
| Figure S19 Luminescence spectra of InPCF-1a, InPCF-1a with 29 mM diphenyl, and InPCF-1a with 29 mM methylviologen.....                                                                                                                                          | 23 |

**Table S1** Selected bond lengths (Å) and angles (°) for **InPCF-1**.

|                     |           |                   |           |
|---------------------|-----------|-------------------|-----------|
| In(1)-O(2)          | 2.072(6)  | O(1)-In(1)#8      | 2.141(5)  |
| In(1)-O(3)          | 2.119(7)  | In(1)-O(5)        | 2.254(7)  |
| In(1)-O(1)#1        | 2.141(5)  | In(1)-O(6)        | 2.302(7)  |
| In(1)-O(1)#2        | 2.141(5)  | P(1)-O(1)         | 1.528(5)  |
| P(1)-O(2)           | 1.527(7)  | P(1)-O(1)#3       | 1.528(5)  |
| O(3)-C(14)          | 1.259(14) | O(4)-C(14)        | 1.245(14) |
| O(5)-C(13)          | 1.261(12) | O(6)-C(13)        | 1.255(12) |
| O(2)-In(1)-O(1)#1   | 99.27(12) | O(2)-In(1)-O(3)   | 84.5(3)   |
| O(2)-In(1)-O(1)#2   | 99.27(12) | O(3)-In(1)-O(1)#1 | 87.90(13) |
| O(1)#1-In(1)-O(1)#2 | 160.5(2)  | O(3)-In(1)-O(1)#2 | 87.90(13) |
| O(3)-In(1)-O(5)     | 129.2(3)  | O(2)-In(1)-O(5)   | 146.4(2)  |
| O(1)#2-In(1)-O(5)   | 83.97(12) | O(1)#1-In(1)-O(5) | 83.97(12) |
| O(3)-In(1)-O(6)     | 173.7(3)  | O(2)-In(1)-O(6)   | 89.3(2)   |
| O(1)#2-In(1)-O(6)   | 93.13(12) | O(1)#1-In(1)-O(6) | 93.13(12) |

Symmetry transformations used to generate equivalent atoms: #1  $-y+1/2, -x+1/2, -z+3/2$ ;  
#2  $-y+1/2, -x+1/2, z+1/2$ ; #3  $x, y, -z+2$ ; #4  $-y+1, x, z$ ; #5  $y, -x, -z+2$ ; #6  $-y, x, z$ ; #7  $y, -x+1, -z+2$  #8  $-y+1/2, -x+1/2, z-1/2$

**Table S2 Hydrogen bonds for InPCF-1<sup>a</sup>.**

| D-H...A             | d(D-H) / Å | d(H...A) / Å | d(D...A) / Å | <DHA / ° |
|---------------------|------------|--------------|--------------|----------|
| O(8)-H(8B)...O(1)   | 0.85       | 2.16         | 2.991(18)    | 165.4    |
| O(9)-H(9A)...O(4)#8 | 0.85       | 1.93         | 2.78(3)      | 179.0    |

<sup>a</sup>Symmetry code: #8 -y+1/2, -x+1/2, z-1/2

**Table S3** Comparison of some MOFs for sensing Cu<sup>2+</sup> ion at room temperature

| MOFs                                                                                                                                                                          | $K_{sv}/M^{-1}$ | Active sites                         | The charge of frameworks | Pore size                                                           |
|-------------------------------------------------------------------------------------------------------------------------------------------------------------------------------|-----------------|--------------------------------------|--------------------------|---------------------------------------------------------------------|
| <b>InPCF-1</b>                                                                                                                                                                | <b>1840.1</b>   | Uncoordinated carbonyl oxygen sites  | anion                    | <b><math>7.19 \times 7.19 \text{ \AA}^2</math></b>                  |
| [Eu(pdc)] <sub>n</sub> <sup>1</sup>                                                                                                                                           | 89.4            | Uncoordinated pyridyl nitrogen sites | neutral                  | $6.3 \times 8.5 \text{ \AA}^2$                                      |
| [Mg(DHT)] <sub>n</sub> <sup>2</sup>                                                                                                                                           | 170.2           | Uncoordinated hydroxyl oxygen sites  | neutral                  | $5.3 \times 5.5 \text{ \AA}^2$                                      |
| {[Tb <sub>4</sub> (μ <sub>3</sub> -OH) <sub>4</sub> (BPDC) <sub>3</sub> (BPDCA) <sub>0.5</sub> (H <sub>2</sub> O) <sub>6</sub> ]-ClO <sub>4</sub> ] <sub>n</sub> <sup>3</sup> | 344.7           | Uncoordinated pyridyl nitrogen sites | cationic                 | $4.5 \times 5.5 \text{ \AA}^2$                                      |
| [Eu <sub>2</sub> (FMA) <sub>2</sub> (OX)(H <sub>2</sub> O) <sub>4</sub> ] <sub>n</sub> <sup>4</sup>                                                                           | 528.7           | Carboxylate oxygen sites             | neutral                  | $4.0 \times 5.0 \text{ \AA}^2$ $3.8 \times 3.8 \text{ \AA}^2$       |
| [Eu <sub>3</sub> (L) <sub>2</sub> (HCOO) <sub>2</sub> (DMF) <sub>2</sub> (H <sub>2</sub> O)] [H <sub>2</sub> N(Me) <sub>2</sub> ] <sub>n</sub> <sup>5</sup>                   | 2350            | Uncoordinated pyridyl nitrogen sites | anion                    | $4.5 \times 5.5 \text{ \AA}^2$ (window)<br>$11 \text{ \AA}$ (cage ) |

**References**

- 1 B. L. Chen, L. B. Wang, Y. Q. Xiao, F. R. Fronczek, M. Xue, Y. J. Cui and G. D. Qian, *Angew. Chem. Int. Ed.* **2009**, *48*, 500–503.
- 2 K. Jayaramulu, R. P. Narayanan, S. J. George and T. K. Maji, *Inorg. Chem.* **2012**, *51*, 10089–10091.
- 3 Y. Q. Xiao, Y. J. Cui, Q. Zheng, S. C. Xiang, G. D. Qian and B. L. Chen, *Chem. Commun.* **2010**, *46*, 5503–5505.
- 4 J. M. Zhou, W. Shi, H. M. Li, H. Li and P. Cheng, *J. Phys. Chem. C* **2014**, *118*, 416–426.
- 5 B. Liu, W. P. Wu, L. Hou and Y. Y. Wang, *Chem. Commun.* **2014**, *50*, 8731–8734.

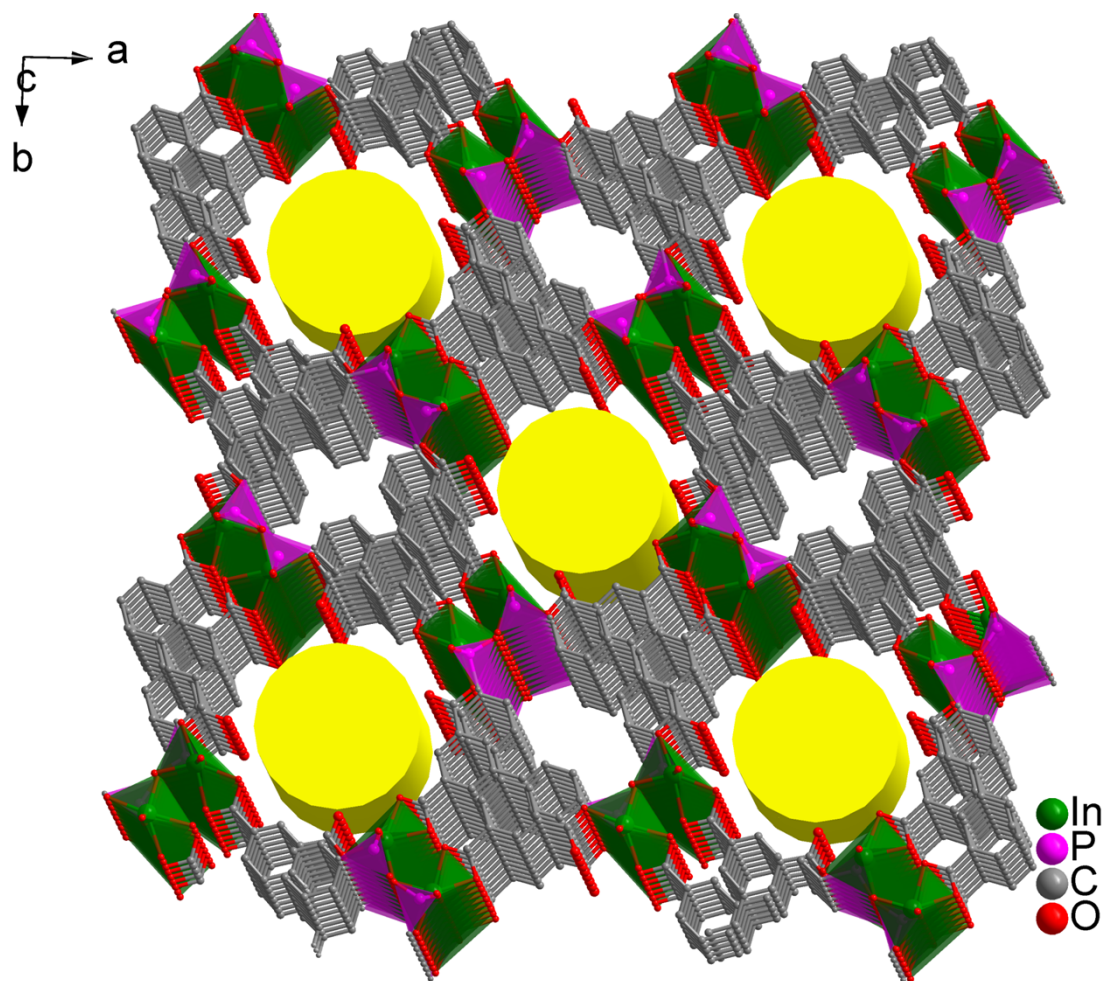

**Figure S1** Packing view of InPCF-1 (Water and hydrogen atoms is omitted for clarity yellow columns are added to highlight the 1-D channels).

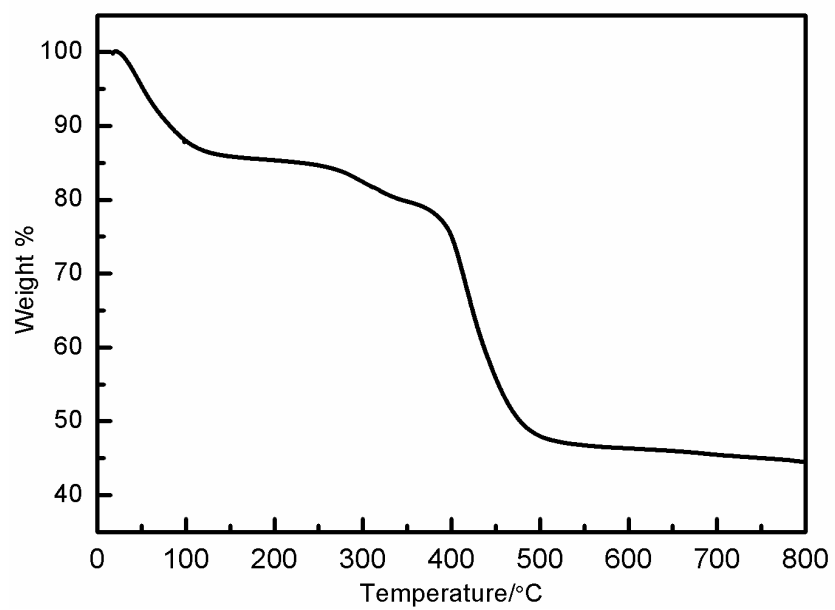

**Figure S2** TGA curve of as-synthesized **InPCF-1**.



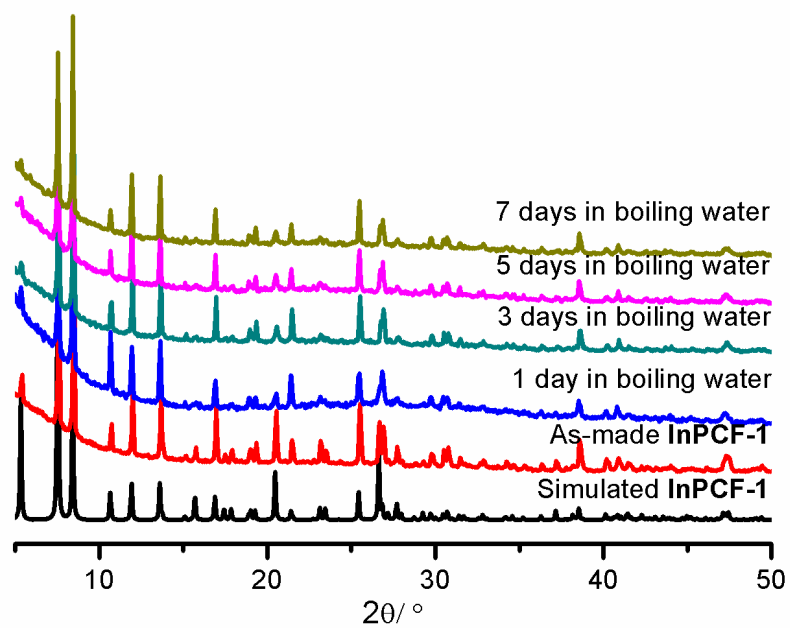

**Figure S3** The PXRD patterns for **InPCF-1** in boiling water for up to 7 days.

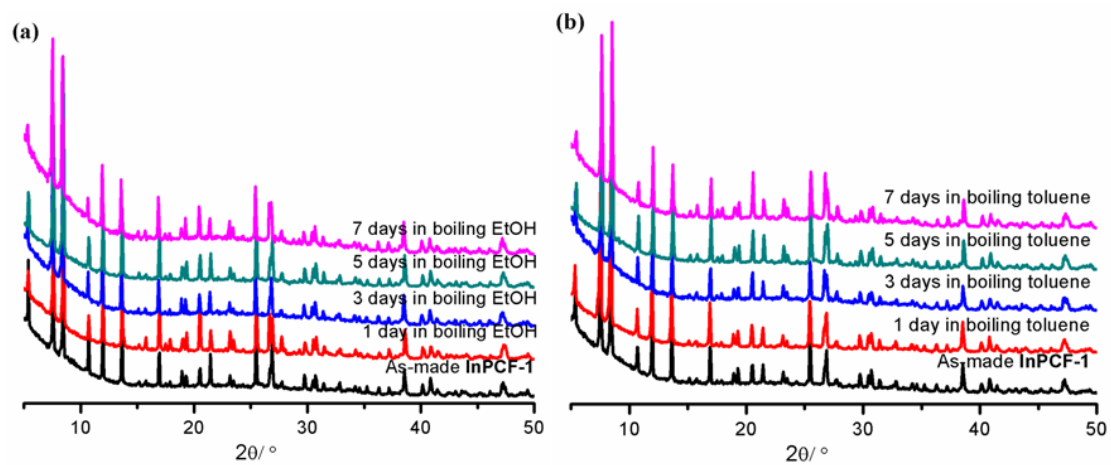

**Figure S4** The PXRD patterns for InPCF-1 measured during chemical stability tests. (a) In refluxing EtOH at 80 °C for up to 7 days. (b) In refluxing toluene at 110 °C for up to 7 days.

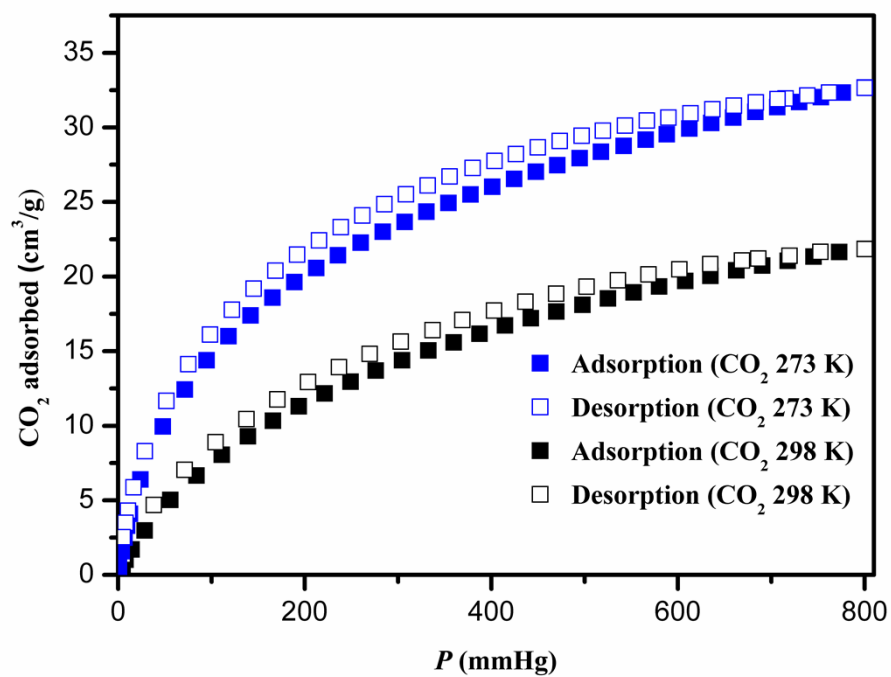

**Figure S5** The CO<sub>2</sub> isotherms at 273 K and 298 K for InPCF-1.

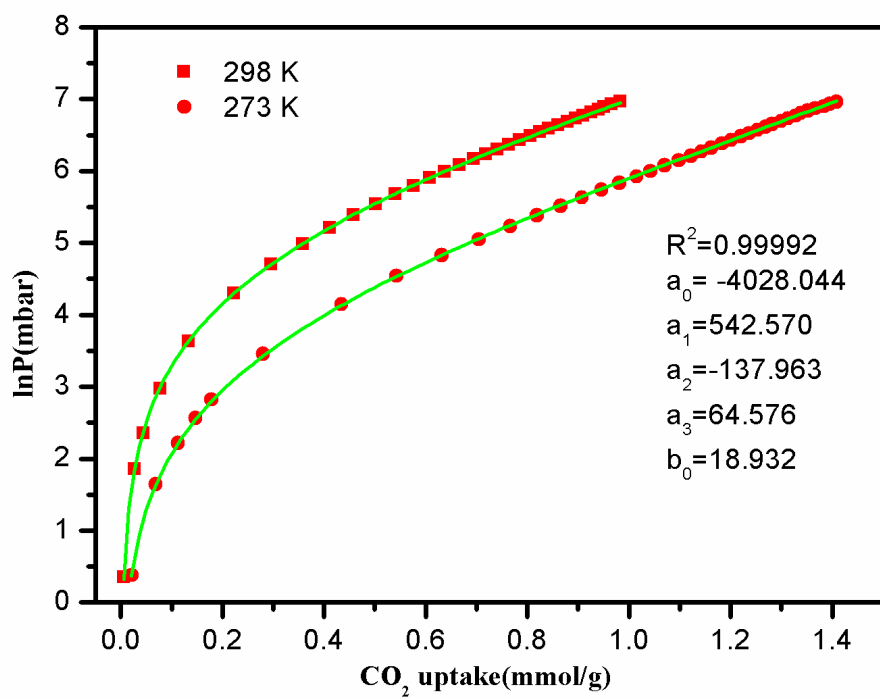

**Figure S6** The CO<sub>2</sub> isotherms at 273 K and 298 K (symbols) and the Virial equation fits (lines) for InPCF-1.

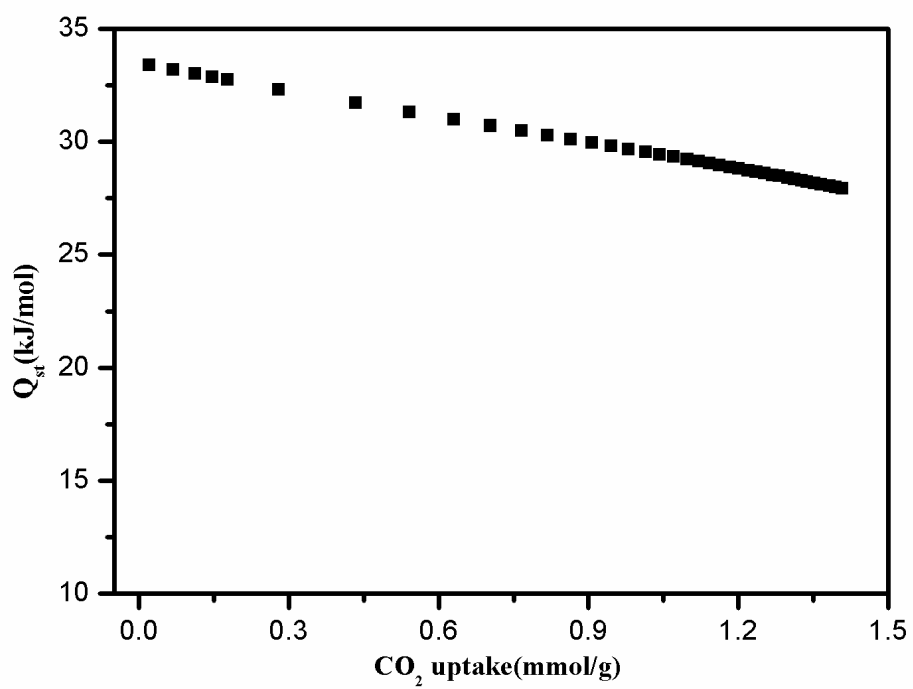

**Figure S7** Isosteric heats of  $CO_2$  adsorption for **InPCF-1**

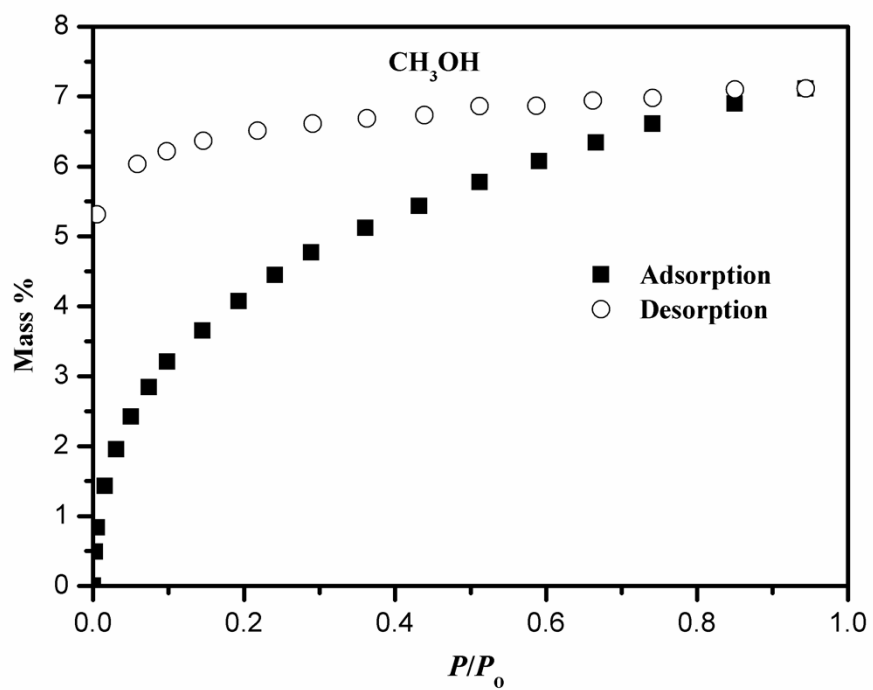

**Figure S8** The CH<sub>3</sub>OH isotherm at 298 K for InPCF-1.

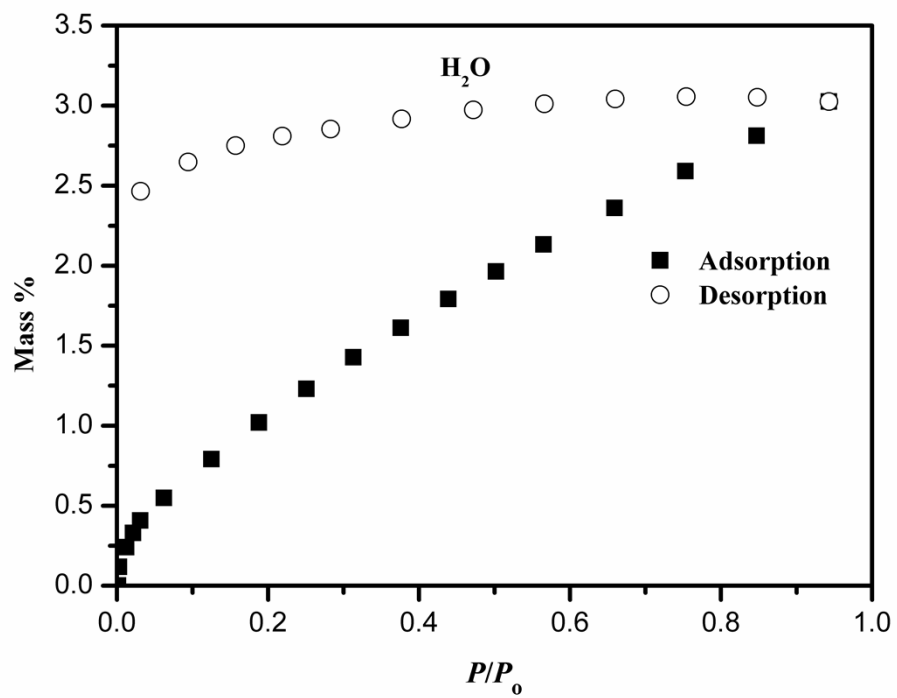

Figure S9 The H<sub>2</sub>O isotherm at 298 K for InPCF-1.

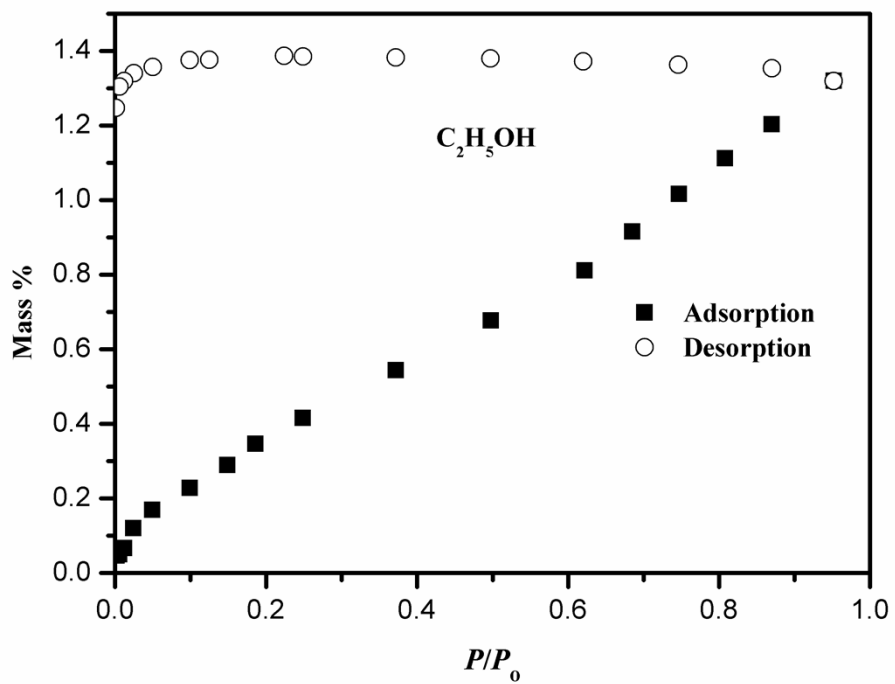

**Figure S10** The  $C_2H_5OH$  isotherm at 298 K for InPCF-1.



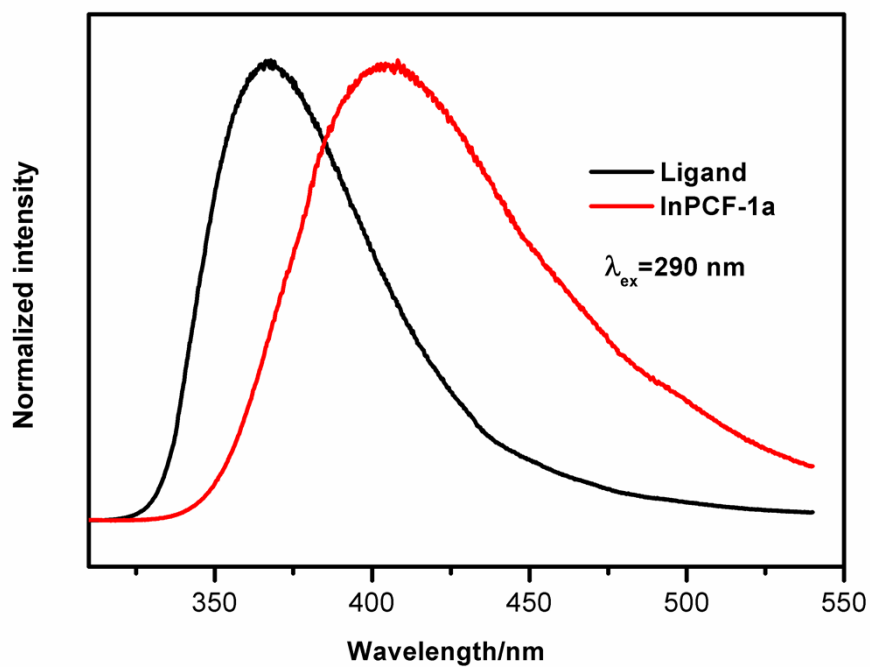

**Figure S11** Solid state luminescence spectra of ligand and **InPCF-1a** upon excitation at 290 nm at room temperature.

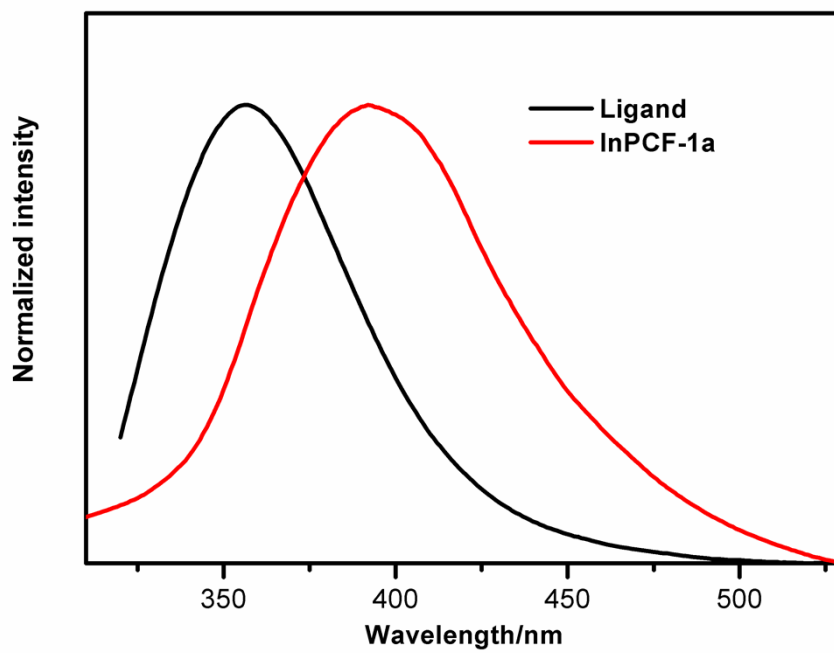

**Figure S12** Luminescence spectra of ligand and **InPCF-1a** in DMF solution upon excitation at 290 nm.

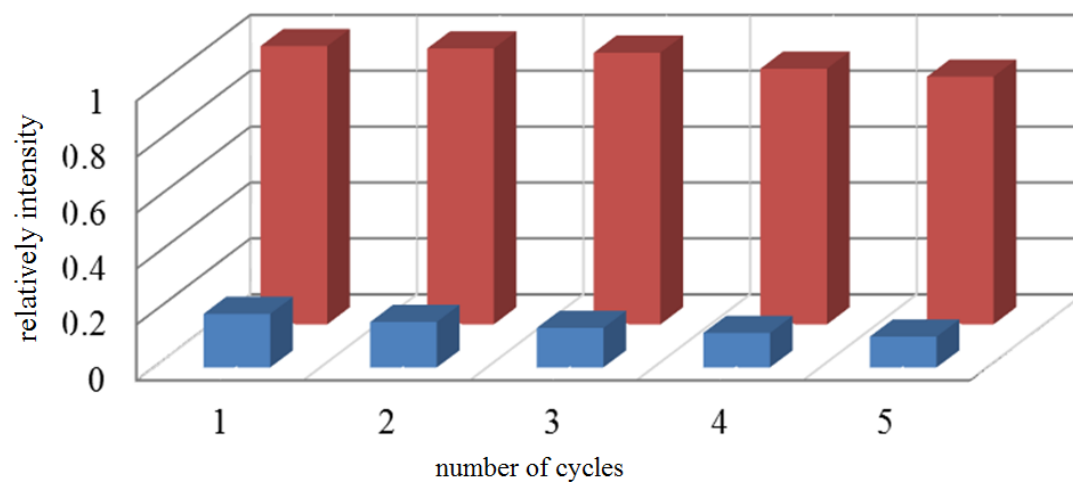

**Figure S13** Multiple cycles for the quenching by  $\text{Cu}(\text{NO}_3)_2$  and the recovery after filtration and ultrasonic washing by DMF for three times. The red bars show the pristine intensity and regenerated ones after washing; while the blue bars show the intensities after addition of  $\text{Cu}(\text{NO}_3)_2$ @DMF solutions



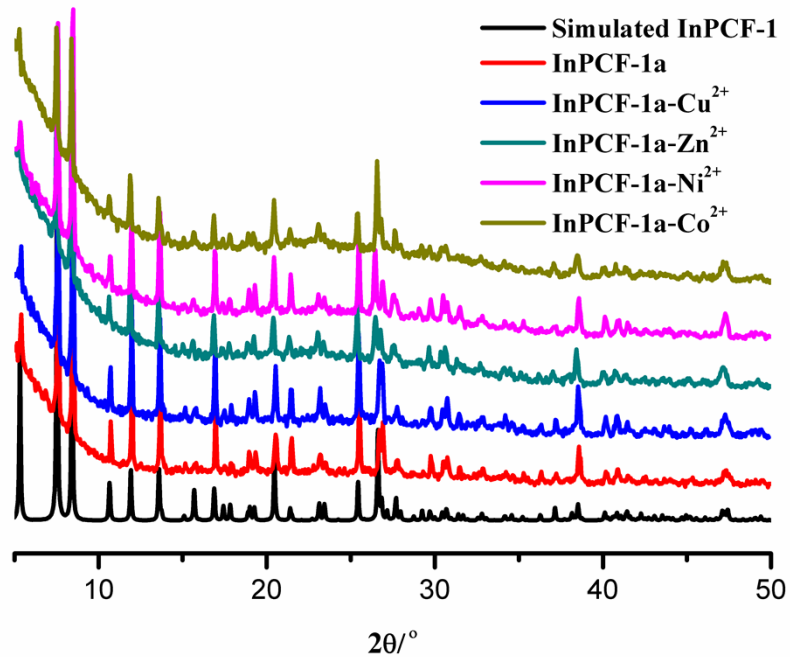

**Figure S14** PXRD of **InPCF-1a** and sample after immersing  $\text{M}(\text{NO}_3)_2$  ( $\text{M} = \text{Cu}^{2+}$   $\text{Zn}^{2+}$   $\text{Ni}^{2+}$   $\text{Co}^{2+}$ ) DMF solution

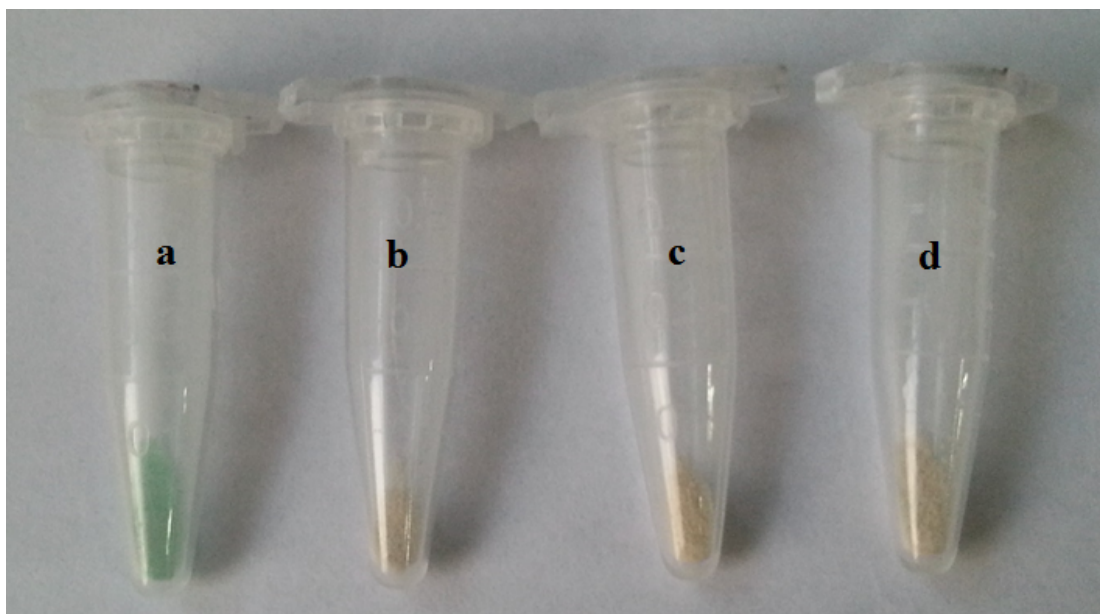

**Figure S15** Photographs of **InPCF-1a** soaked in DMF solution containing  $M(\text{NO}_3)_2$  with  $10^{-2}$  M, a)  $\text{Cu}^{2+}$ , b)  $\text{Co}^{2+}$ , c)  $\text{Ni}^{2+}$ , d)  $\text{Zn}^{2+}$  for 24 h.

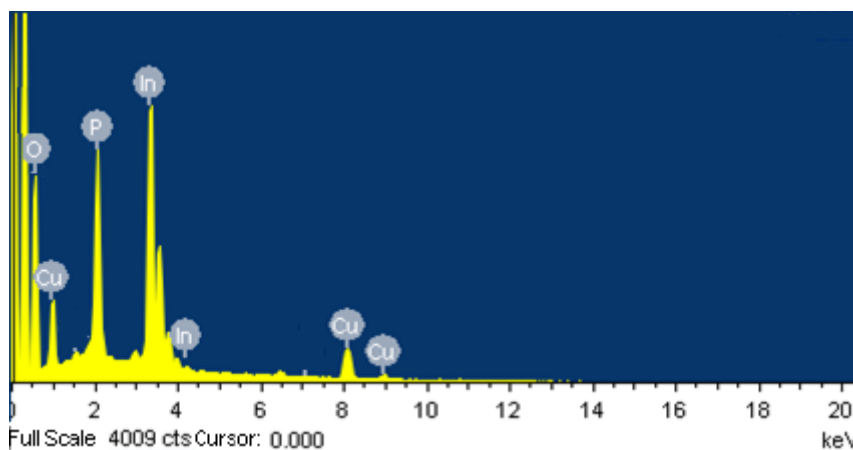

**Figure S16** The EDS of the solid samples of **InPCF-1a-Cu<sup>2+</sup>** obtained by centrifugal separation of **InPCF-1a** soaked in DMF solution containing  $M(NO_3)_2$  with  $10^{-2}$  M, washing with DMF , and drying in 60 °C oven.

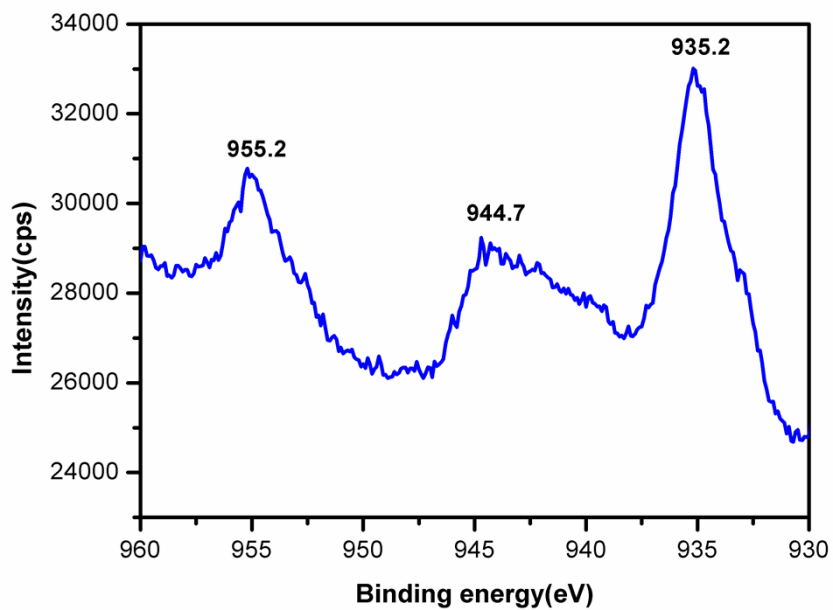

**Figure S17** X-ray photoelectron spectroscopy (XPS) spectra of Cu<sup>2+</sup>-incorporated **InPCF-1a**.



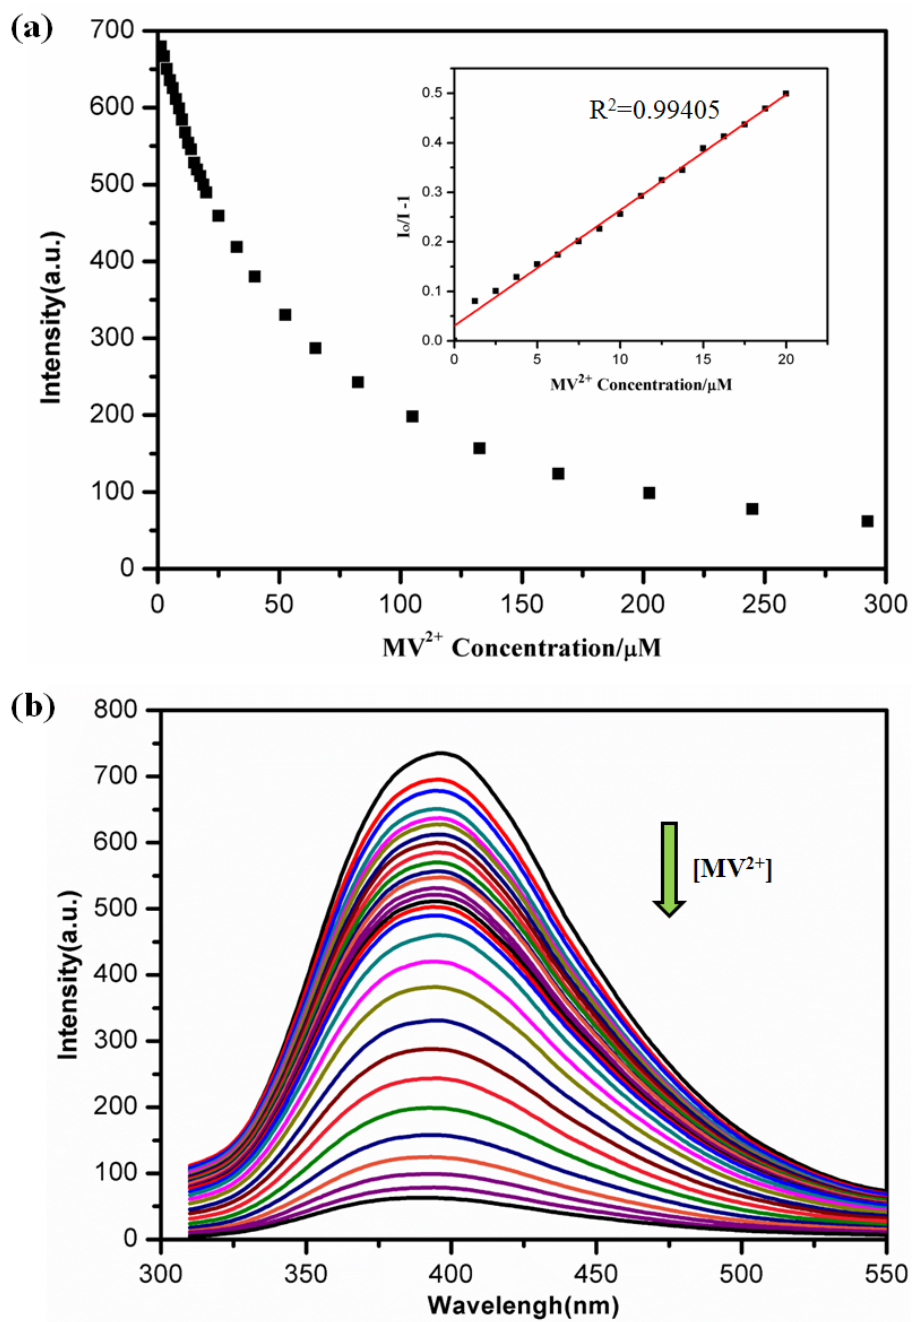

**Figure S18** (a) and (b) Concentration-dependent luminescence intensities of **InPCF-1a** by the addition of different contents of  $MV^{2+}$  DMF solution (Ex at 290 nm)

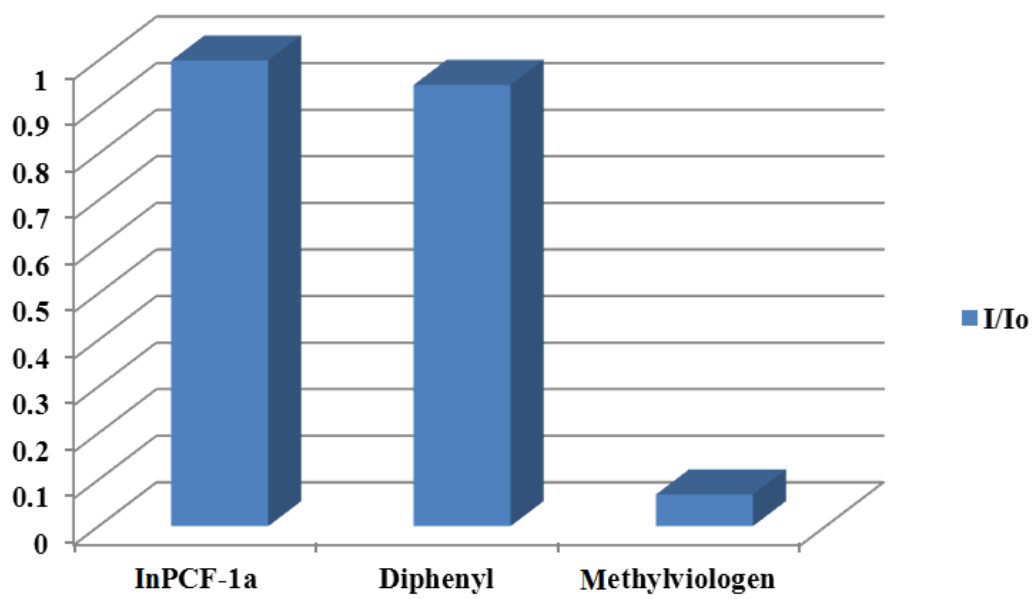

**Figure S19** Luminescence spectra of **InPCF-1a**, **InPCF-1a** with 29 mM diphenyl, and **InPCF-1a** with 29 mM methylviologen.
